# Supplementary material for: Optofluidic differential colorimetry for rapid nitrite determination
Source: Royal Society of Chemistry journal article supplement (doi:10.1039/c8lc00690c), 2018-01-01
Supplement: c8lc00690c1.pdf [file c8lc00690c1.pdf]

## Electronic Supplementary Information

### Optofluidic differential colorimetry for rapid nitrite determination

Y. Shi,<sup>ab</sup> H. L. Liu,<sup>a</sup> X. Q. Zhu,<sup>ab</sup> J. M. Zhu,<sup>a</sup> Y. F. Zuo,<sup>ab</sup> Y. Yang,<sup>\*ab</sup> F. H. Jiang,<sup>c</sup> C. J. Sun,<sup>c</sup> W. H. Zhao<sup>d</sup> and X. T. Han<sup>d</sup>

<sup>a</sup>Key Laboratory of Artificial Micro- and Nano- Structures of Ministry of Education, School of Physics & technology, Wuhan University, Wuhan 430072, China. E-mail: yangyiys@whu.edu.cn

<sup>b</sup>Shenzhen Research Institute, Wuhan University, Shenzhen 518000, China

<sup>c</sup>The First Institute of Oceanography, SOA, China

<sup>d</sup>Institute of Oceanology, Chinese Academy of Sciences, China

*Experimental results when  $c = 0.33$  mM and the light intensity when absorption cells are affected by impurity:*

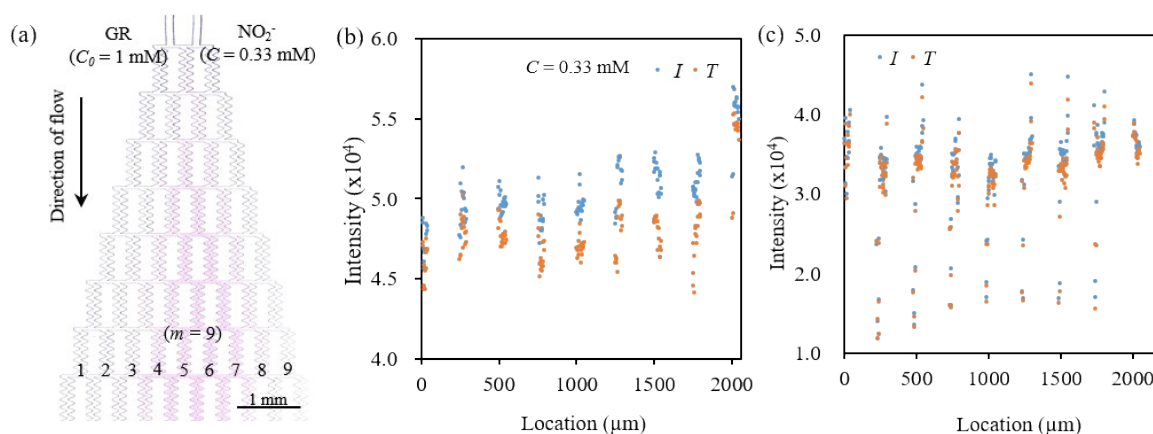

S1. The micrograph (a) and transmitted light intensity (b) of microfluidic network when the concentration ratio of colour reagent and nitrite equals 3:1. (c) The transmitted light intensity in detection points measured under the influence of impurities.
